# Supplementary material for: 159. II-TV (2048×2048 マトリクス) リアルタイムデジタルラジオグラフィの画質評価(X 線装置-6 DR 装置-1 2048 マトリックス)
Source: Royal Society of Chemistry journal article supplement (doi:10.1039/d4nr01478b), 1991-08-01
Supplement: d4nr01478b1.pdf [file d4nr01478b1.pdf]

## Electronic Supplementary Information (ESI): Magnetic clusters as efficient EY-like spin-scattering centre in graphene

Wout Keijers<sup>1\*</sup>, Ramasamy Murugesan<sup>2</sup>, Guillaume Libeert<sup>1</sup>,  
Bart Raes<sup>3</sup>, Steven Brems<sup>3</sup>, Stefan De Gendt<sup>3</sup>, Michel Houssa<sup>2,3</sup>,  
Ewald Janssens<sup>1</sup>, Joris Van de Vondel<sup>1\*</sup>

<sup>1</sup>Quantum Solid-State Physics, Department of Physics and Astronomy,  
KU Leuven, Celestijnenlaan 200D, Leuven, B-3001, Belgium.

<sup>2</sup>Semiconductor Physics Laboratory, Department of Physics and  
Astronomy, KU Leuven, Celestijnenlaan 200D, Leuven, B-3001, Belgium.

<sup>3</sup>IMEC, Kapeldreef 75, Leuven, B-3001, Belgium.

### 1 Dependence of the computed quantities on the Ni<sub>4</sub> cluster density

To check that the difference in cluster density between the theory and experiment does not affect our conclusions, we performed additional simulations by varying the graphene supercell sizes:  $4 \times 4$  (corresponding to a density of  $11.8 \cdot 10^{13} \text{ cm}^{-2}$ ),  $6 \times 6$  ( $5.3 \cdot 10^{13} \text{ cm}^{-2}$ ) and  $7 \times 7$  ( $3.9 \cdot 10^{13} \text{ cm}^{-2}$ ); their respective band structures are plotted in Fig S1. From this figure, it can be clearly seen that by increasing or decreasing the cluster density, the Ni<sub>4</sub> cluster always transfer electrons to graphene (n-type doping), as observed from the shift of the Fermi level above the Dirac point. The calculated doping efficiency was found to be 0.064 e/cluster ( $4 \times 4$ ), 0.093 e/cluster ( $6 \times 6$ ) and 0.11 e/cluster ( $7 \times 7$ ), respectively. The estimated doping efficiency varies within the range of  $\pm 0.02$  from the values provided in the main text for the ( $5 \times 5$ ) supercell, which is 0.09 e/cluster. Similarly the average valence band spin splittings are found to be 39.6 meV ( $4 \times 4$ ), 39.1 meV ( $6 \times 6$ ) and 30.6 meV ( $7 \times 7$ ). The average conduction band spin splittings are found to be 23.5 meV ( $4 \times 4$ ), 17.1 meV ( $6 \times 6$ ) and 10.2 meV ( $7 \times 7$ ). Though the values vary slightly with the cluster density (which is similar to observations for small gold clusters in [1], the splittings of the valence band

are consistently larger than the conduction band ones across all the simulated cluster densities, thereby maintaining a similar trend. Therefore, the variation in cluster densities should not drastically affect the main conclusions drawn in this work.

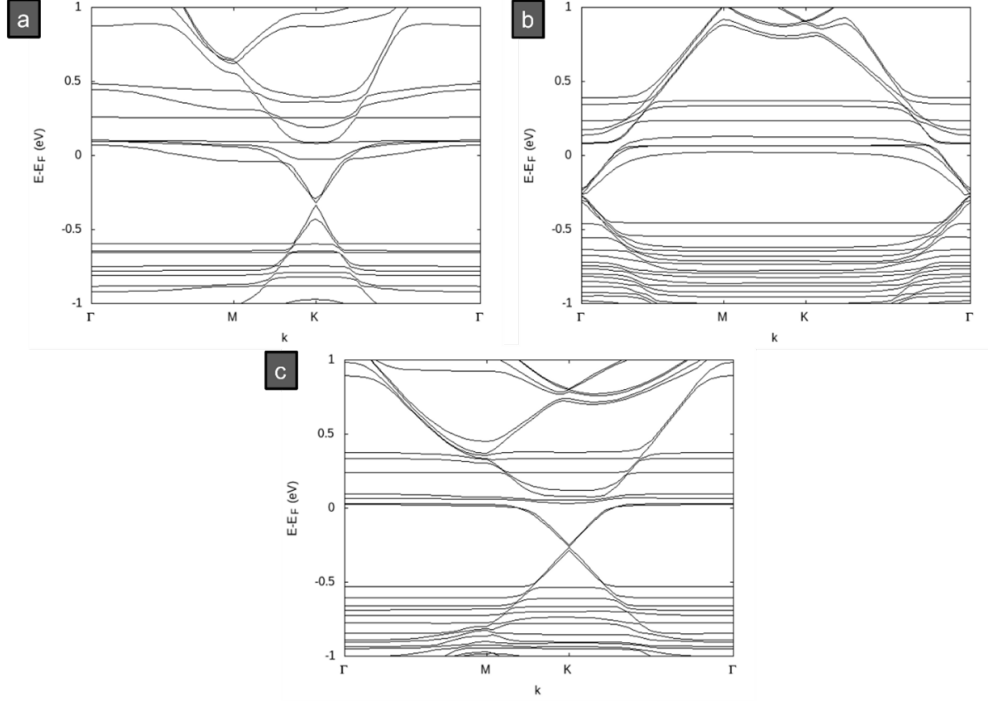

**Fig. 1** Simulated non-collinear electronic structure of the  $\text{Ni}_4$  cluster adsorbed on graphene for varying supercell sizes: (a)  $4 \times 4$  (cluster density of  $11.8 \cdot 10^{13} \text{ cm}^{-2}$ ), (b)  $6 \times 6$  ( $5.3 \cdot 10^{13} \text{ cm}^{-2}$ ) and (c)  $7 \times 7$  ( $3.9 \cdot 10^{13} \text{ cm}^{-2}$ ). In the case of the  $6 \times 6$  supercell (multiple of  $3n$ ), the K and ( $K'$ ) points are folded to the  $\Gamma$  point of graphene.

**Acknowledgements.** This work is supported by the Research Foundation-Flanders (FWO, Belgium), Grant No. G0D5619N

## References

- [1] Keijers, W., Murugesan, R., Libeert, G., Scheerder, J.E., Raes, B., Brems, S., Gendt, S.D., Houssa, M., Janssens, E., Vondel, J.V.: Tuning the spintronic properties of graphene with atomically precise au clusters. *Journal of Physics: Materials* 4(4), 045005 (2021)
